# Supplementary material
Source: PubMed Central journal article supplement (PMC9627516)
Supplement: jama-e2220423-s001.pdf [file jama-e2220423-s001.pdf]

## Supplemental Online Content

White K, Sierra G, Lerma K, et al. Association of Texas' 2021 ban on abortion in early pregnancy with the number of facility-based abortions in Texas and surrounding states. *JAMA*. doi:10.1001/jama.2022.20423

**eMethods 1.** Completeness of Study Data

**eMethods 2.** Model Estimation Details

**eTable 1.** Data Sources for Abortions Provided Before and After Implementation of Texas Senate Bill 8 (SB8)

**eTable 2.** Estimated Change in Abortions Related to Implementation of Texas Senate Bill (SB8) in September 2021

**eTable 3.** Prevalence Ratios Estimating Factors Associated With Texans Obtaining an Out-of-State Abortion  $\geq 12$  Weeks of Gestation After Implementation of Texas Senate Bill 8

**eFigure.** Smoothed Mean Number of Days and Range of Days Until the Next Available Appointment at Out-of-State Abortion Facilities After Implementation of Texas Senate Bill 8, by Geographic Service Regions and Month, September 2021-February 2022

This supplemental material has been provided by the authors to give readers additional information about their work.

## **eMethods 1. Completeness of study data**

Monthly totals of Texas-resident abortions in Kansas were estimated for the period September 2020 through July 2021. For 2020, five months of data reported directly by Kansas facilities for another study (see ref 9), was subtracted from the 2020 annual total, reported by the state health department, and the difference was averaged over the remaining seven calendar months. A similar estimate was made using 2021 annual totals and the four months of 2021 data that Kansas facilities provided after implementation of Texas Senate Bill 8 (SB8).

Negative binomial models assessing changes in the number of abortions after (vs before) implementation of SB8 did not account for differences in data source or missingness. Although the data sources were different between the two policy periods, there was the same level of coverage (e.g., all facilities or the same facilities were included) in both periods in five of the seven states, including Texas. In the two other states, where state health department data was used for the pre-SB8 period and facility reports were used for the post-SB8 period, the facilities that directly reported data after SB8 provided the vast majority ( $\geq 95\%$ ) of Texas-resident abortions when compared to state health department data and data reported for other studies (see ref 9). Based on this and the geographic location of the facilities for which data were not available in these two states after SB8, most Texas-resident abortions that occurred in this sample of states and facilities were likely documented in the analysis.

## **eMethods 2. Model estimation details**

The negative binomial model coefficients from the interrupted time series analysis assessing changes in Texas in-state, Texas-resident out-of-state and total documented abortions can be interpreted as follows. “Baseline monthly abortion trend (September 2020 through August 2021)” is modeled as a continuous variable and represents the underlying month-to-month trend in abortions before SB8. “Implementation of Texas SB8” is modeled as a binary variable and represents the change in the number of abortions the month after SB8 went into effect (September 2021) relative to the month immediately prior (August 2021). “Change in the monthly trend since implementation of SB8” is modeled as a continuous variable and refers to the change in the linear trend in monthly abortions after implementation of SB8 (September 2021-February 2022) relative to the monthly trend in abortions in the period before SB8 took effect (September 2020 through August 2021).

**eTable 1. Data sources for abortions provided before and after implementation of Texas Senate Bill 8 (SB8).**

|            | <b>Before SB8</b><br>September 2020-<br>August 2021 |                               | <b>After SB8</b><br>September 2021-<br>February 2022 |                               |
|------------|-----------------------------------------------------|-------------------------------|------------------------------------------------------|-------------------------------|
|            | Data source                                         | Facilities<br>reporting/total | Data source                                          | Facilities<br>reporting/total |
| Texas      | Facilities                                          | 18/23                         | Facilities                                           | 18/23                         |
| Arkansas   | Facilities                                          | 2/2                           | Facilities                                           | 2/2                           |
| Colorado   | State Health Dept                                   | --                            | Facilities                                           | 16/23                         |
| Kansas     | State Health Dept                                   | --                            | Facilities                                           | 3/4                           |
| Louisiana  | State Health Dept                                   | --                            | State Health Dept <sup>a</sup>                       | --                            |
| Oklahoma   | State Health Dept                                   | --                            | Facilities                                           | 4/4                           |
| New Mexico | Facilities                                          | 4/5                           | Facilities                                           | 6/7                           |

-- State health department data includes all or the majority of abortions, but the number of facilities reporting data was not available.

Louisiana state health department data were available through December 2021; data from one of three facilities were available for the entire period between September 2021 and February 2022. When compared to state health department data, this facility provided 77% of Texas-resident abortions.

**eTable 2. Estimated change in abortions related to implementation of Texas Senate Bill 8 (SB8) in September 2021**

|                                                                                     | <b>Texas-based abortions</b> | <b>Out-of-state abortions</b> | <b>All abortions</b> |
|-------------------------------------------------------------------------------------|------------------------------|-------------------------------|----------------------|
|                                                                                     | IRR (95% CI)                 | IRR (95% CI)                  | IRR (95% CI)         |
| Baseline monthly abortion trend before SB8<br>(Sept 2020 through Aug 2021)          | 1.02 (1.00-1.03)             | 1.04 (1.01-1.06)              | 1.02 (1.01-1.03)     |
| Implementation of SB8<br>(Sept 2021)                                                | 0.43 (0.36-0.51)             | 5.38 (4.19-6.91)              | 0.67 (0.56-0.79)     |
| Change in monthly trend since implementation of<br>SB8 (Sept 2021 through Feb 2022) | 1.00 (0.96-1.04)             | 0.98 (0.92-1.04)              | 1.00 (0.96-1.04)     |

IRR: Incidence Rate Ratio estimated from negative binomial regression models; CI: Confidence Interval

The negative binomial model coefficients from the interrupted time series analysis assessing changes in Texas in-state, Texas-resident out-of-state and total documented can be interpreted as follows. “Baseline monthly abortion trend (September 2020 through August 2021) is modeled as a continuous variable and represents the underlying month-to-month trend in abortions before SB8. “Implementation of Texas SB8” is modeled as a binary variable and represents the change in the number of abortions the month after SB8 went into effect (September 2021) relative to the month immediately prior (August 2021). “Change in the monthly trend since implementation of SB8” is modeled as a continuous variable and refers to the change in the linear trend in monthly abortions after implementation of SB8 (September 2021-February 2022) relative to the monthly trend in abortions in the period before SB8 took effect (September 2020 through August 2021).

**eTable 3. Prevalence ratios estimating factors associated with Texans obtaining an out-of-state abortion  $\geq 12$  weeks of gestation after implementation of Texas Senate Bill 8 (n=6,657)**

|                                                             | No.   | % abortions $\geq 12$ weeks | PR (95% CI)      |
|-------------------------------------------------------------|-------|-----------------------------|------------------|
| <b>Wait time to next appointment, 5-day increase</b>        | 6,657 | --                          | 1.15 (1.08-1.23) |
| <b>State policy</b>                                         |       |                             |                  |
| No in-person visit before mandatory waiting period (KS, OK) | 3,675 | 18.3                        | 1 (ref)          |
| Mandatory in-person visit and waiting period (AR, LA)       | 1,306 | 39.2                        | 1.85 (1.63-2.10) |
| No gestational limit or mandatory waiting period (NM)       | 1,676 | 35.2                        | 2.03 (1.78-2.32) |
| <b>Patient age, years</b>                                   |       |                             |                  |
| <18                                                         | 182   | 34.6                        | 1.43 (1.09-1.87) |
| 18-24                                                       | 2,500 | 26.4                        | 1.12 (0.99-1.26) |
| 25-29                                                       | 1,874 | 24.8                        | 1 (ref)          |
| 30-34                                                       | 1,228 | 26.5                        | 1.08 (0.93-1.25) |
| $\geq 35$                                                   | 873   | 29.9                        | 1.19 (1.01-1.39) |
| <b>Zip code-level quintiles of economic distress</b>        |       |                             |                  |
| Lowest distress quintile                                    | 1,625 | 25.9                        | 1 (ref)          |
| Second lowest distress quintile                             | 1,090 | 25.3                        | 0.93 (0.79-1.09) |
| Mid distress quintile                                       | 1,150 | 26.6                        | 0.98 (0.84-1.14) |
| Second highest distress quintile                            | 1,264 | 26.9                        | 0.95 (0.82-1.10) |
| Highest distress quintile                                   | 1,528 | 28.2                        | 0.96 (0.83-1.11) |

-- continuous variable; percentage not reported.

PR: Prevalence Ratios estimated from multivariable-adjusted Poisson regression models and values greater than 1 indicate the outcome was more common in this group, compared to the reference category; all variables were included in a single model. CI: Confidence Interval; AR: Arkansas, LA: Louisiana, KS: Kansas, NM: New Mexico, OK: Oklahoma

**eFigure. Smoothed mean number of days and range of days until the next available appointment at out-of-state abortion facilities after implementation of Texas Senate Bill 8, by geographic service-regions and month, September 2021-February 2022**

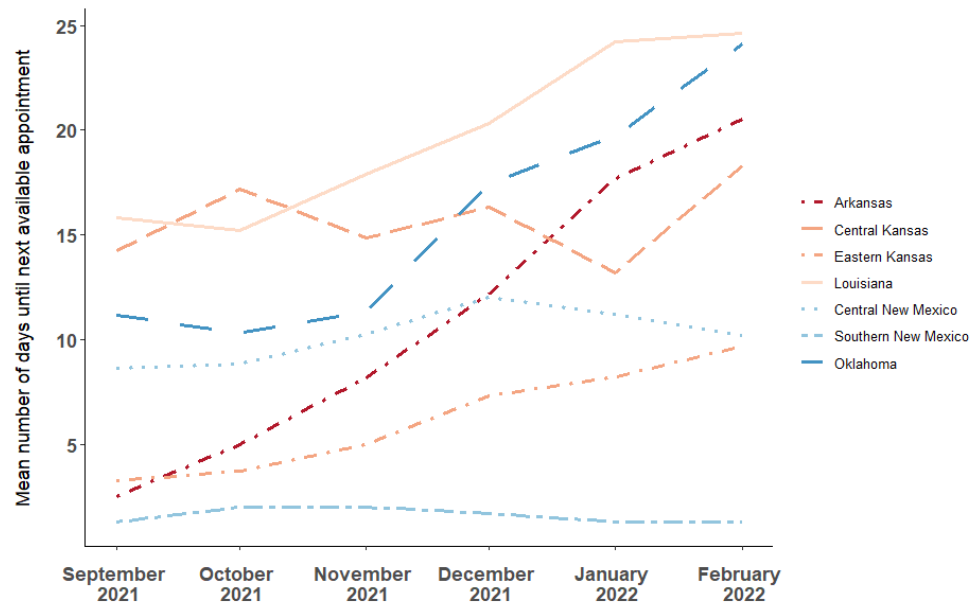

|                         | Sept 2021     | Oct 2021 | Nov 2021 | Dec 2021 | Jan 2022 | Feb 2022 |
|-------------------------|---------------|----------|----------|----------|----------|----------|
| Region (No. facilities) | Range of days |          |          |          |          |          |
| Arkansas (2)            | (1,6)         | (1,2)    | (5,15)   | (11,15)  | (12,15)  | (25,28)  |
| Central Kansas (2)      | (14,19)       | (10,14)  | (18,28)  | (8,11)   | (15,18)  | (9,18)   |
| Eastern Kansas (2)      | (2,5)         | (2,4)    | (3,6)    | (6,9)    | (6,14)   | (6,8)    |
| Louisiana (3)           | (8,14)        | (16,21)  | (8,19)   | (14,28)  | (20,28)  | (21,28)  |
| Central New Mexico (5)  | (1,20)        | (1,15)   | (1,18)   | (2,28)   | (2,28)   | (1,22)   |
| Southern New Mexico (1) | --            | --       | --       | --       | --       | --       |
| Oklahoma (4)            | (5,23)        | (3,22)   | (4,13)   | (10,28)  | (28,32)  | (12,21)  |

-- Range is not reported because appointment wait time information was not routinely available for one of the two facilities in this region.
